# Supplementary material
Source: PubMed Central journal article supplement (PMC10169412)
Supplement: awac465_supplementary_data.pdf [file awac465_supplementary_data.pdf]

The CNS HIV Anti-Retroviral Therapy Effects Research (CHARTER) group is affiliated with Johns Hopkins University; the Icahn School of Medicine at Mount Sinai; University of California, San Diego; University of Texas, Galveston; University of Washington, Seattle; Washington University in St. Louis; and is headquartered at the University of California, San Diego and includes: Robert K. Heaton, Ph.D., Scott L. Letendre, M.D., Ronald J. Ellis, M.D., Ph.D., Christine Fennema-Notestine, Ph.D., Rebecca Theilmann, Ph.D., Amanda Bischoff-Grethe, Bin Tang, Clint Cushman, Debra Cookson, Matthew Dawson, and Donald Franklin, Jr.; Johns Hopkins University Site: Leah Rubin, Ph.D. (P.I.); Icahn School of Medicine at Mount Sinai Site: Susan Morgello, M.D. (P.I.), Letty Mintz, N.P.; University of California, San Diego Site: J. Allen McCutchan, M.D. (P.I.); University of Washington, Seattle Site: Christina Marra, M.D. (P.I.); University of Texas, Galveston Site: Benjamin Gelman, M.D., Ph.D. (P.I.), Eleanor Head, R.N., B.S.N.; and Washington University, St. Louis Site: David Clifford, M.D. (P.I.), Beau Ances, M.D., Ph.D., Muhammad Al-Lozi, M.D., Mengesha Teshome, M.D. We also gratefully acknowledge the contribution of Jules Levin of The National AIDS Treatment Advocacy Project.
